# Supplementary material for: Cellular activity of siRNA oligonucleotides containing synthetic isomorphic nucleoside surrogates
Source: Royal Society of Chemistry journal article supplement (doi:10.1039/c4cc08809c), 2014-12-05
Supplement: c4cc08809c1.pdf [file c4cc08809c1.pdf]

# Cellular activity of siRNA oligonucleotides containing synthetic isomorphous nucleoside surrogates

Dongwon Shin,<sup>a</sup> , Peter Lönn,<sup>b</sup> Steven F. Dowdy<sup>b</sup> and Yitzhak Tor<sup>a\*</sup>

<sup>a</sup>Department of Chemistry and Biochemistry, University of California, San Diego, La Jolla, CA 92093-0358, USA.

<sup>b</sup>Cellular & Molecular Medicine, University of California, San Diego, La Jolla, CA 92093-0686, USA.

Correspondence to: Email address ytor@ucsd.edu

## Supporting Information

Page

|                                                          |    |
|----------------------------------------------------------|----|
| S.1. Oligonucleotides: Synthesis and Purification .....  | S1 |
| S.2. Oligonucleotides: MALDI-TOF MS .....                | S2 |
| S.3. UV-monitored Thermal Denaturation Experiments ..... | S2 |
| S.4. Hybridization and Transfection .....                | S3 |
| References .....                                         | S4 |

### **S1. Oligonucleotides: Synthesis and Purification**

Solid-phase oligonucleotide synthesis was performed on an Expedite 8909 synthesizer using commercially available reagents and phosphoramidites (Glen Research). The modified phosphoramidites were chemically synthesized (full synthetic details will be separately published in due course) and incorporated into oligonucleotide with coupling efficiency comparable to the commercially available phosphoramidites. The solution of the modified phosphoramidite was dried overnight over molecular sieve 3A (dried for 2 days at 300 °C under high vacuum) and was filtered using syringe filter right before use. Oligonucleotides were synthesized (with trityl-off) on a 500 Å CPG solid support column (1 µmol scale). Cleavage from the solid support and deprotection were accomplished with AMA (ammonium hydroxide/methylamine in water = 1/1) at 65 °C for 30 min. The 2'-TOM or TBDMS group was removed by TEA·3HF at 65 °C for 3 h and the residue was desalted by precipitation (Glen Report 19-20, Glen Research). All oligonucleotides were purified by preparative polyacrylamide gel electrophoresis (PAGE) using the crush and soak method; the desired band was cut out, pulverized, extracted with 50 mM TEAA (pH 7.0) for a minimum of 12 h (while shaking) and decanted. The buffer containing the purified oligonucleotide was lyophilized and the residue was taken up in 0.2 M TEAB (pH 7.0) buffer and desalted on a Sep-pek C-18 (Waters). The oligonucleotides were eluted with 40 v% acetonitrile in water. The purified oligonucleotides were quantified by UV absorbance at 260 nm at 70 °C by Shimadzu UV 2450 and confirmed by MALDI-TOF mass spectrometry. Oligonucleotide concentration was then determined using Beer's Law with the following extinction coefficients: rCMP, 7200; rUMP, 9900; rGMP, 11500; rAMP, 15400; and <sup>th</sup>A, 7160; <sup>th</sup>U, 8200; <sup>th</sup>G, 5500, and <sup>th</sup>C, 11500.

## S2. Oligonucleotides: MALDI-TOF MS

The MW of the modified oligonucleotides was determined *via* MALDI-TOF MS. An aliquot of 400 pmol of the oligonucleotide was lyophilized and then dissolved in 1  $\mu$ L of water and combined with 1  $\mu$ L of 100 mM ammonium citrate buffer (PE Biosystems), and 4  $\mu$ L of saturated 3-hydroxypicolinic acid. The sample was spotted onto a gold-coated plate and air dried. MALDI-TOF spectra were recorded on a PE Biosystems Voyager-DE STR MALDI-TOF spectrometer in negative-ion, delayed-extraction mode.

| NO. | RNA    | Calculated MS | Found MS                       | $\epsilon_{260}$ |
|-----|--------|---------------|--------------------------------|------------------|
| 5   | G4     | 6775.99       | 6775.86                        | 218157           |
| 6   | G7     | 6775.99       | 6781.40                        | 218157           |
| 7   | G13    | 6775.99       | 6782.40                        | 218157           |
| 8   | G16    | 6775.99       | 6775.60                        | 218157           |
| 9   | G19    | 6775.99       | 6778.50                        | 218157           |
| 10  | G4-5   | 6792.10       | 6794.77                        | 212174           |
| 11  | 5Gs    | 6840.20       | 6845.76                        | 194225           |
| 12  | U2     | 6816.02       | 6816.00                        | 222450           |
| 13  | U6     | 6816.02       | 6871.29 [M+K+NH <sub>3</sub> ] | 222450           |
| 14  | U9     | 6816.02       | 6817.19                        | 222450           |
| 15  | U14    | 6816.02       | 6826.28 [M+NH <sub>3</sub> ]   | 222450           |
| 16  | U2-6   | 6872.11       | 6911.34 [M+K]                  | 220760           |
| 17  | C8     | 6816.01       | 6830.91 [M+NH <sub>3</sub> ]   | 228458           |
| 18  | C10    | 6816.01       | 6836.42 [M+Na]                 | 228458           |
| 19  | C8-10  | 6872.09       | 6890.96 [M+Na]                 | 232776           |
| 20  | A11    | 6775.99       | 6779.50                        | 215846           |
| 21  | A15    | 6775.99       | 6781.40 [M+Li]                 | 215846           |
| 22  | A11-15 | 6792.05       | 6799.00 [M+Li]                 | 207552           |

**Table S1.** MALDI-Tof MS and extinction coefficient of siRNA at 260 nm.

## S3. UV-monitored Thermal Denaturation Experiments

Melting temperatures were determined by measuring changes in absorbance at 260 nm as a function of temperature using a Beckman-Coulter DU 640 spectrophotometer equipped with a high performance temperature controller and micro auto six-cell holder. Absorbance was recorded in the forward and reverse direction at temperatures from 25 to 95 °C at a rate of 1 °C/min. The melting samples were denatured at 95 °C for 5 min and annealed slowly to RT then stored at 4 °C until experiments were initiated. All melting samples were prepared in a total volume of 500  $\mu$ L containing 1  $\mu$ M of each strand oligonucleotide, 20 mM sodium cacodylate (pH 7.0), 20 mM NaCl and 0.5 mM EDTA. Melting curves were fit with the nonlinear least-squares program described by Turner et al.,<sup>s1,s2</sup> and van't Hoff analyses were obtained from these melting curves.<sup>s3</sup> All calculations were performed by PeakFit v4.0 (SPSS Inc.).

P 3' -TUG ACC CAC GAG UCC AUC ACC -5'  
 G 5' - C UGG GUG CUC AGG UAG UGG UT-3'

| NO. | Duplex <sup>a</sup> | T <sub>m</sub> (°C) <sup>b</sup> | stdev. | ΔT <sub>m</sub> <sup>c</sup> | -ΔG <sub>37</sub> <sup>o</sup><br>(kcal/mol) | stdev. | -ΔH <sup>o</sup><br>(kcal/mol) | stdev. | -ΔS <sup>o</sup><br>(cal/mol) | stdev. |
|-----|---------------------|----------------------------------|--------|------------------------------|----------------------------------------------|--------|--------------------------------|--------|-------------------------------|--------|
| 2   | WT                  | 74.8                             | 0.07   | 0.0                          | 15.7                                         | 0      | 69.1                           | 1.1    | 0.172                         | 0.004  |
| 5   | G4                  | 74.3                             | 0.71   | -0.5                         | 14.2                                         | 0.4    | 55.5                           | 1.5    | 0.133                         | 0.004  |
| 6   | G7                  | 75.4                             | 0.64   | 0.6                          | 17.9                                         | 0.2    | 86.3                           | 1.1    | 0.221                         | 0.003  |
| 7   | G13                 | 75.3                             | 0.64   | 0.5                          | 16.5                                         | 0.5    | 74.0                           | 4.0    | 0.185                         | 0.011  |
| 8   | G16                 | 75.3                             | 0.64   | 0.5                          | 18.6                                         | 0      | 93.3                           | 0.4    | 0.241                         | 0.001  |
| 9   | G19                 | 75.8                             | 0.07   | 1.0                          | 18.2                                         | 0      | 89.6                           | 0.7    | 0.230                         | 0.002  |
| 10  | G4.5                | 75.8                             | 0.07   | 1.0                          | 16.5                                         | 0.8    | 76.1                           | 4.3    | 0.192                         | 0.011  |
| 11  | 5GS                 | 71.8                             | 0.14   | -2.9                         | 15.5                                         | 0.3    | 71.3                           | 0.9    | 0.181                         | 0.004  |
| 12  | U2                  | 74.4                             | 0.64   | -0.4                         | 14.4                                         | 1.1    | 57.3                           | 7.8    | 0.138                         | 0.022  |
| 13  | U6                  | 73.9                             | 0.07   | -0.9                         | 15.4                                         | 0.1    | 70.9                           | 1.8    | 0.179                         | 0.005  |
| 14  | U9                  | 71.9                             | 0.00   | -2.8                         | 14.7                                         | 0.1    | 64.6                           | 1.6    | 0.161                         | 0.005  |
| 15  | U14                 | 73.0                             | 0.07   | -1.8                         | 16.0                                         | 0.2    | 73.4                           | 1.1    | 0.185                         | 0.003  |
| 16  | U2.6                | 71.8                             | 0.00   | -3.0                         | 15.8                                         | 0.6    | 73.5                           | 4.2    | 0.186                         | 0.012  |
| 17  | C8                  | 72.4                             | 0.78   | -2.4                         | 14.6                                         | 0.1    | 63.1                           | 2.3    | 0.156                         | 0.007  |
| 18  | C10                 | 73.9                             | 0.07   | -0.9                         | 14.8                                         | 0.6    | 62.1                           | 4.3    | 0.152                         | 0.012  |
| 19  | C8.10               | 72.9                             | 0.00   | -1.8                         | 15.5                                         | 0.4    | 71.1                           | 4.6    | 0.179                         | 0.013  |
| 20  | A11                 | 75.3                             | 0.71   | 0.5                          | 15.7                                         | 0.1    | 67.1                           | 1.1    | 0.166                         | 0.001  |
| 21  | A15                 | 75.3                             | 0.71   | 0.5                          | 14.8                                         | 0.2    | 60.0                           | 0.0    | 0.146                         | 0.001  |
| 22  | A11.15              | 77.9                             | 0.07   | 3.1                          | 17.3                                         | 0.1    | 77.3                           | 1.2    | 0.194                         | 0.003  |

**Table S2.** siRNA Duplexes with Melting Temperatures; <sup>a</sup> Passenger strand are listed on top and guide strands below. <sup>b</sup>T<sub>m</sub> values were measured at duplex concentrations of 1 μM in 20 mM sodium cacodylate, pH 7.0, 20 mM NaCl, and 0.5 mM EDTA. Errors of at least two independent T<sub>m</sub> measurements were less than 0.8 °C.; <sup>c</sup> Difference in T<sub>m</sub> compared to WT.

#### S4. Hybridization and Transfection

Human H1299 lung adenocarcinoma cells containing an integrated, constitutively expressed destabilized GFP (dGFP) reporter gene (~2 h half-life) were cultured in medium which contains DMEM (Invitrogen) supplemented with 5% fetal bovine serum (Life Technologies), 100 units/ml penicillin, and 100 units/ml streptomycin (Invitrogen). Transfection mixtures were prepared in 100 ul OptiMem-I<sup>+</sup> with 2 ul Lipofectamine<sup>+</sup> 2000 (Invitrogen), and left at room temperature for 20 minutes prior to treatment. Cells were reverse transfected overnight in 24-well plates at 80,000 cells/well in 400 ul medium to which 100 ul transfection mixtures was added. After transfection cells were trypsinized and replated. Knockdown of GFP was analyzed by flow cytometry on a BD Biosciences LSR II (BD Sciences, San Jose, CA) at time point of 24, 48 and 72 hour. All experiments were performed triple times or more. Three different set of experiments, which are 1) <sup>14</sup>C-modified, 2) <sup>3</sup>H-U- and <sup>3</sup>H-C-modified and 3) <sup>3</sup>H-A-modified siRNAs, was performed and the data were normalized by each WT results.

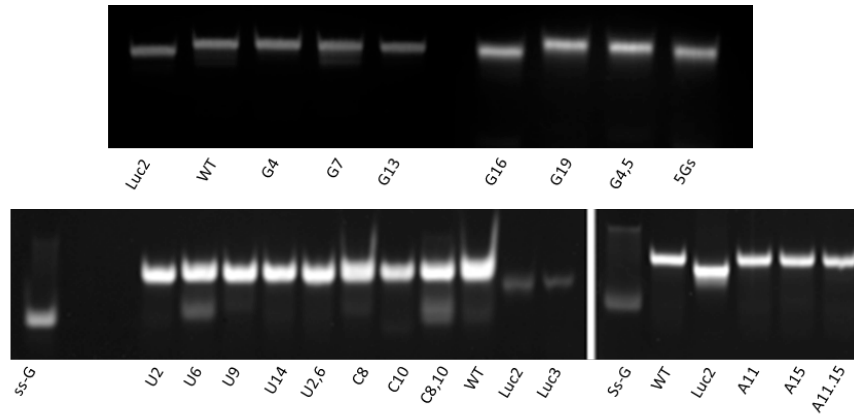

**Figure S1.** Representations of siRNA hybridization prior to transfection

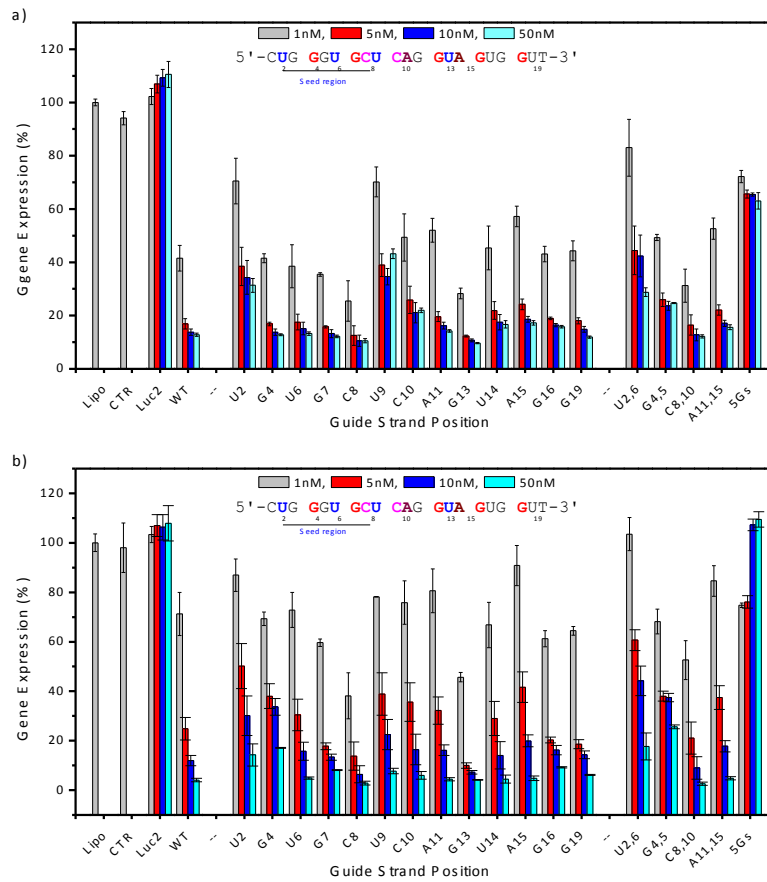

**Figure S2.** Gene expression of dGFP; a) 24 h; b) 72 hour; Lipo = lipofectamin only; CTR = buffer; Luc2 = luciferase2; WT = wild type; grey = 1 nM, red = 5 nM, blue = 10 nM, cyan = 50 nM.

## References

- (s1) Petersheim, M.; Turner, D. H., *Biochemistry*. **1983**, *22*, 256-263.
- (s2) Longfellow, C. E.; Kierzek, R.; Turner, D. H., *Biochemistry*. **1990**, *29*, 278-285.
- (s3) Marky, L. A.; Breslauer, K. J., *Biopolymers*. **1987**, *26*, 1601-1620.
